# Supplementary material for: A copper(ii) coordination compound under water-oxidation reaction at neutral conditions: decomposition on the counter electrode
Source: Royal Society of Chemistry journal article supplement (doi:10.1039/d2dt01572b), 2022-01-01
Supplement: d2dt01572b1.pdf [file d2dt01572b1.pdf]

# Supporting Information

# A Copper(II) Coordination Compound under Water-oxidation Reaction at Neutral Conditions: Decomposition on the Counter Electrode

Younes Mousazade,<sup>a</sup> Subhajit Nandy,<sup>b</sup> Rahman Bikas,<sup>c</sup> Pavlo Aleshkevych,<sup>d</sup> Keun Hwa Chae,<sup>b</sup> Milosz Siczek,<sup>e</sup> Tadeusz Lis,<sup>e</sup> Suleyman I. Allakhverdiev,<sup>f,\*</sup> and Mohammad Mahdi Najafpour<sup>\*a,g,h</sup>

<sup>a</sup>Department of Chemistry, Institute for Advanced Studies in Basic Sciences (IASBS), Zanjan, 45137-66731, Iran

<sup>b</sup>Advanced Analysis Center, Korea Institute of Science and Technology, Seoul 02792, Republic of Korea

<sup>c</sup>Department of Chemistry, Faculty of Science, Imam Khomeini International University, 34148-96818, Qazvin, Iran

<sup>d</sup>Institute of Physics, Polish Academy of Sciences, Warsaw, 02-668, Poland

<sup>e</sup>Faculty of Chemistry, University of Wroclaw, Joliot-Curie 14, Wroclaw 50-383, Poland

<sup>f</sup>K. A. Timiryazev Institute of Plant Physiology, Russian Academy of Sciences, Botanicheskaya Street 35, Moscow 127276, Russia

<sup>g</sup>Center of Climate Change and Global Warming, Institute for Advanced Studies in Basic Sciences (IASBS), Zanjan, 45137-66731, Iran

<sup>h</sup>Research Center for Basic Sciences & Modern Technologies (RBST), Institute for Advanced Studies in Basic Sciences (IASBS), Zanjan, 45137-66731, Iran

\*Corresponding authors: [suleyman.allakhverdiev@gmail.com](mailto:suleyman.allakhverdiev@gmail.com)(SIA); [mmnajafpour@iasbs.ac.ir](mailto:mmnajafpour@iasbs.ac.ir)(MMN)

## Table of contents

| <b>Title</b>                                                                                                                           | <b>Page</b> |
|----------------------------------------------------------------------------------------------------------------------------------------|-------------|
| Table S1 Crystallographic information of compound <b>1</b> .                                                                           | S4          |
| Table S2 Selected bond lengths and angles in the crystal structure of compound <b>1</b> .                                              | S5          |
| Table S3 Hydrogen bond interactions in the crystal structure of compound <b>1</b> .                                                    | S6          |
| Figure S1 Electrospray ionization (ESI) mass spectroscopy of compound <b>1</b> in water.                                               | S8          |
| Figure S2 SEM and corresponding EDX mapping of the working electrode (FTO) in the presence of compound <b>1</b> at 0.11 V for 3 hours. | S9          |
| Figure S3 SEM images of the working electrode (FTO) in the presence of compound <b>1</b> at 2.41 V for 3 hours.                        | S10         |
| Figure S4 SEM and corresponding EDX mapping of the working electrode (FTO) in the presence of compound <b>1</b> at 2.41 V for 3 hours. | S11         |
| Figure S5 SEM images of the working electrode (FTO) in the presence of compound <b>1</b> at 2.31 V for 3 hours.                        | S12         |
| Figure S6 SEM and corresponding EDX mapping of the working electrode (FTO) in the presence of compound <b>1</b> at 2.31 V for 3 hours. | S13         |

Table S1 Crystallographic information of compound **1**.

---

|                                            |                                                                          |
|--------------------------------------------|--------------------------------------------------------------------------|
| Compound                                   | <b>1</b>                                                                 |
| net formula                                | $C_{30}H_{24}CuN_6O_6 \cdot 2(NO_3) \cdot 0.5(C_2H_6O) \cdot 0.75(H_2O)$ |
| $M_r/g\ mol^{-1}$                          | 788.66                                                                   |
| crystal size/mm                            | $0.27 \times 0.22 \times 0.09$                                           |
| T/K                                        | 100                                                                      |
| crystal shape, color                       | Block, Green                                                             |
| crystal system                             | Monoclinic                                                               |
| space group                                | $P2_1/n$                                                                 |
| Absorption correction                      | Analytical                                                               |
| $a/\text{\AA}$                             | 12.800(4)                                                                |
| $b/\text{\AA}$                             | 21.718(7)                                                                |
| $c/\text{\AA}$                             | 24.685(7)                                                                |
| $\beta/\text{\AA}$                         | 94.90(3)                                                                 |
| $V/\text{\AA}^3$                           | 6837(4)                                                                  |
| Z                                          | 8                                                                        |
| $D_x/Mg\ m^{-3}$                           | 1.532                                                                    |
| $\mu/mm^{-1}$                              | 0.71                                                                     |
| $F(000)$                                   | 3244                                                                     |
| Measured reflections                       | 59580                                                                    |
| Independent reflections                    | 17274                                                                    |
| Reflections with $I > 2\sigma(I)$          | 7995                                                                     |
| Parameters                                 | 1026                                                                     |
| $R_{int}$                                  | 0.134                                                                    |
| $\theta$ range/ $^\circ$                   | 3.0–24.5                                                                 |
| $T_{min}, T_{max}$                         | 0.880, 0.950                                                             |
| $h, k, l$                                  | $-16 \rightarrow 15, -27 \rightarrow 27, -34 \rightarrow 28$             |
| $R[F^2 > 2\sigma(F^2)]$                    | 0.092                                                                    |
| $R_w(F^2)$                                 | 0.252                                                                    |
| S                                          | 1.01                                                                     |
| Shift/error $_{max}$                       | < 0.001                                                                  |
| Max electron density/ $e\ \text{\AA}^{-3}$ | 1.07                                                                     |
| Min electron density/ $e\ \text{\AA}^{-3}$ | -0.56                                                                    |
| CCDC                                       | 2171141                                                                  |

---

Table S2 Selected bond lengths and angles in the crystal structure of compound **1**.

| <b>Bond</b> | <b>Length/Å</b> | <b>Bond</b> | <b>Angle/°</b> |
|-------------|-----------------|-------------|----------------|
| Cu1–O11     | 1.961(3)        | O11–Cu1–O22 | 178.52(14)     |
| Cu1–O22     | 1.969(3)        | O11–Cu1–O21 | 88.08(14)      |
| Cu1–O21     | 2.056(4)        | O22–Cu1–O21 | 90.67(14)      |
| Cu1–O23     | 2.107(4)        | O11–Cu1–O23 | 92.41(14)      |
| Cu1–O12     | 2.175(4)        | O22–Cu1–O23 | 88.88(14)      |
| Cu1–O13     | 2.178(4)        | O21–Cu1–O23 | 176.80(16)     |
| Cu2–O26     | 1.950(4)        | O11–Cu1–O12 | 91.35(15)      |
| Cu2–O24     | 1.966(4)        | O22–Cu1–O12 | 87.92(14)      |
| Cu2–O16     | 1.990(4)        | O21–Cu1–O12 | 92.54(15)      |
| Cu2–O15     | 1.991(4)        | O23–Cu1–O12 | 90.61(13)      |
| Cu2–O14     | 2.254(4)        | O11–Cu1–O13 | 87.85(15)      |
| Cu2–O25     | 2.276(4)        | O22–Cu1–O13 | 92.99(15)      |
| N11–O11     | 1.342(5)        | O21–Cu1–O13 | 92.57(16)      |
| N12–O12     | 1.338(5)        | O23–Cu1–O13 | 84.29(14)      |
| N13–O13     | 1.329(6)        | O12–Cu1–O13 | 174.80(13)     |
| N14–O14     | 1.316(6)        | O26–Cu2–O24 | 174.43(17)     |
| N15–O15     | 1.335(5)        | O26–Cu2–O16 | 89.65(16)      |
| N16–O16     | 1.345(6)        | O24–Cu2–O16 | 95.32(16)      |
| N21–O21     | 1.339(6)        | O26–Cu2–O15 | 91.59(15)      |
| N22–O22     | 1.336(5)        | O24–Cu2–O15 | 83.50(15)      |
| N23–O23     | 1.344(5)        | O16–Cu2–O15 | 178.22(17)     |
| N24–O24     | 1.338(5)        | O26–Cu2–O14 | 91.78(17)      |
| N25–O25     | 1.326(7)        | O24–Cu2–O14 | 85.95(14)      |
| N26–O26     | 1.341(7)        | O16–Cu2–O14 | 87.41(15)      |
|             |                 | O15–Cu2–O14 | 93.82(15)      |
|             |                 | O26–Cu2–O25 | 90.23(18)      |
|             |                 | O24–Cu2–O25 | 92.02(16)      |
|             |                 | O16–Cu2–O25 | 92.84(16)      |
|             |                 | O15–Cu2–O25 | 85.88(15)      |
|             |                 | O14–Cu2–O25 | 177.97(15)     |

Table S3 Hydrogen bond interactions in the crystal structure of compound **1**.

| <i>D</i> – <i>H</i> … <i>A</i>                      | <i>D</i> – <i>H</i> | <i>H</i> … <i>A</i> | <i>D</i> … <i>A</i> | <i>D</i> – <i>H</i> … <i>A</i> |
|-----------------------------------------------------|---------------------|---------------------|---------------------|--------------------------------|
| C21–H21…O14 <sup>i</sup>                            | 0.95                | 2.36                | 3.153(7)            | 141                            |
| C51–H51…N23 <sup>ii</sup>                           | 0.95                | 2.68                | 3.420(7)            | 136                            |
| C51–H51…O23 <sup>ii</sup>                           | 0.95                | 2.43                | 3.359(7)            | 166                            |
| C101–H101…O2 <i>B</i>                               | 0.95                | 2.61                | 3.283(10)           | 129                            |
| C101–H101…O3 <i>B</i>                               | 0.95                | 2.49                | 3.436(9)            | 173                            |
| C22–H22…O3 <i>D</i> <sup>a</sup>                    | 0.95                | 2.55                | 3.35(2)             | 142                            |
| C22–H22…O2 <i>E</i> <sub>b</sub>                    | 0.95                | 2.45                | 3.18(2)             | 134                            |
| C22–H22…O3 <i>E</i> <sup>b</sup>                    | 0.95                | 2.64                | 3.222(17)           | 120                            |
| C42–H42…O11 <sup>ii</sup>                           | 0.95                | 2.44                | 3.099(6)            | 126                            |
| C52–H52…O23 <sup>ii</sup>                           | 0.95                | 2.53                | 3.481(6)            | 175                            |
| C72–H72…O2 <i>W</i> <sub>b</sub> <sup>iii</sup>     | 0.95                | 2.50                | 3.170(9)            | 128                            |
| C102–H102…O3 <i>B</i>                               | 0.95                | 2.24                | 3.118(9)            | 153                            |
| C23–H23…O3 <i>C</i> <sup>iv</sup>                   | 0.95                | 2.61                | 3.284(8)            | 128                            |
| C43–H43…O1 <i>C</i> <sup>v</sup>                    | 0.95                | 2.61                | 3.506(9)            | 157                            |
| C43–H43…O2 <i>C</i> <sup>v</sup>                    | 0.95                | 2.58                | 3.364(10)           | 140                            |
| C53–H53…O2 <i>W</i> <sub>b</sub> <sup>v</sup>       | 0.95                | 2.44                | 3.132(10)           | 130                            |
| C73–H73…O15                                         | 0.95                | 2.35                | 3.075(7)            | 132                            |
| C93–H93…O1 <i>D</i> <sub>a</sub>                    | 0.95                | 2.54                | 3.33(2)             | 141                            |
| C93–H93…O1 <i>E</i> <sup>b</sup>                    | 0.95                | 2.52                | 3.159(16)           | 125                            |
| C24–H24…O2 <i>A</i> <sup>iv</sup>                   | 0.95                | 2.46                | 3.147(8)            | 129                            |
| C54–H54…O3 <i>D</i> <sub>a</sub> <sup>vi</sup>      | 0.95                | 2.47                | 3.37(2)             | 157                            |
| C54–H54…O2 <i>E</i> <sub>b</sub> <sup>vi</sup>      | 0.95                | 2.35                | 3.266(18)           | 161                            |
| C74–H74…O21 <sup>iv</sup>                           | 0.95                | 2.24                | 3.041(8)            | 142                            |
| C94–H94…O3 <i>C</i> <sup>vii</sup>                  | 0.95                | 2.65                | 3.358(8)            | 132                            |
| C104–H104…O1 <i>B</i> <sup>vii</sup>                | 0.95                | 2.31                | 3.222(10)           | 160                            |
| C25–H25…O2 <i>B</i>                                 | 0.95                | 2.42                | 3.341(11)           | 163                            |
| C55–H55…O3 <i>D</i> <sub>a</sub> <sup>vi</sup>      | 0.95                | 2.11                | 3.05(2)             | 173                            |
| C55–H55…O2 <i>E</i> <sub>b</sub> <sup>vi</sup>      | 0.95                | 2.50                | 3.44(2)             | 173                            |
| C75–H75…O22                                         | 0.95                | 2.60                | 3.317(8)            | 133                            |
| C75–H75…O13                                         | 0.95                | 2.32                | 3.179(7)            | 150                            |
| C105–H105…O1 <i>B</i> <sup>vii</sup>                | 0.95                | 2.33                | 3.225(10)           | 158                            |
| C26–H26…O26 <sup>viii</sup>                         | 0.95                | 2.52                | 3.133(8)            | 123                            |
| C56–H56…O1 <i>B</i> <sup>vii</sup>                  | 0.95                | 2.60                | 3.530(11)           | 168                            |
| C76–H76…O3 <i>A</i> <sup>vii</sup>                  | 0.95                | 2.57                | 3.145(12)           | 119                            |
| C106–H106…N1 <i>D</i> <sup>vi</sup>                 | 0.95                | 2.46                | 3.280(9)            | 145                            |
| C106–H106…O1 <i>D</i> <sub>a</sub> <sup>vi</sup>    | 0.95                | 2.61                | 3.39(3)             | 140                            |
| C106–H106…O3 <i>D</i> <sub>a</sub> <sup>vi</sup>    | 0.95                | 2.39                | 3.31(2)             | 165                            |
| C106–H106…O1 <i>E</i> <sub>b</sub> <sup>vi</sup>    | 0.95                | 2.49                | 3.111(17)           | 123                            |
| C106–H106…O2 <i>E</i> <sub>b</sub> <sup>vi</sup>    | 0.95                | 2.62                | 3.56(2)             | 171                            |
| O1 <i>F</i> –H1 <i>F</i> …O2 <i>C</i>               | 0.84                | 2.38                | 3.104(15)           | 144                            |
| O1 <i>F</i> –H1 <i>F</i> …O1 <i>W</i> <sub>b</sub>  | 0.84                | 2.22                | 2.888(18)           | 136                            |
| C1 <i>F</i> –H13 <i>A</i> …O1 <i>W</i> <sub>b</sub> | 0.99                | 2.51                | 3.07(3)             | 115                            |

|                                |      |      |           |     |
|--------------------------------|------|------|-----------|-----|
| C2F–H2FC…O1Da <sup>ix</sup>    | 0.98 | 2.49 | 3.03(4)   | 115 |
| O1Ga–H1Ga…O1A <sup>iv</sup>    | 0.84 | 2.06 | 2.879(14) | 164 |
| C1Ga–H1GAa…N24                 | 0.99 | 2.62 | 3.44(2)   | 141 |
| C2Ga–H2GCa…O2C <sup>ii</sup>   | 0.98 | 2.33 | 3.289(19) | 165 |
| O1Wb–H11Wb…N1C                 | 0.89 | 2.56 | 3.233(15) | 133 |
| O1Wb–H11Wb…O2C                 | 0.89 | 2.09 | 2.860(15) | 145 |
| O1Wb–H11Wb…O3C                 | 0.89 | 2.45 | 2.957(15) | 117 |
| O1Wb–H11Wb…O1F                 | 0.89 | 2.34 | 2.888(18) | 120 |
| O1Wb–H21Wb…O2B                 | 0.92 | 2.25 | 3.086(15) | 152 |
| O2Wb–H12Wb…O2C                 | 0.86 | 1.70 | 2.533(15) | 162 |
| O2Wb–H22Wb…O3Wb <sup>vii</sup> | 0.86 | 2.39 | 3.23(2)   | 165 |
| O3Wb–H23Wb…O1A <sup>iv</sup>   | 0.86 | 2.53 | 3.18(3)   | 133 |

Symmetry codes: (i)  $x-1/2, -y+1/2, z-1/2$ ; (ii)  $-x+1, -y, -z+1$ ; (iii)  $-x+1/2, y-1/2, -z+1/2$ ; (iv)  $x+1/2, -y+1/2, z+1/2$ ; (v)  $-x+3/2, y-1/2, -z+1/2$ ; (vi)  $x+1, y, z$ ; (vii)  $-x+1, -y+1, -z+1$ ; (viii)  $-x+2, -y+1, -z+1$ ; (ix)  $x+1/2, -y+1/2, z-1/2$ .

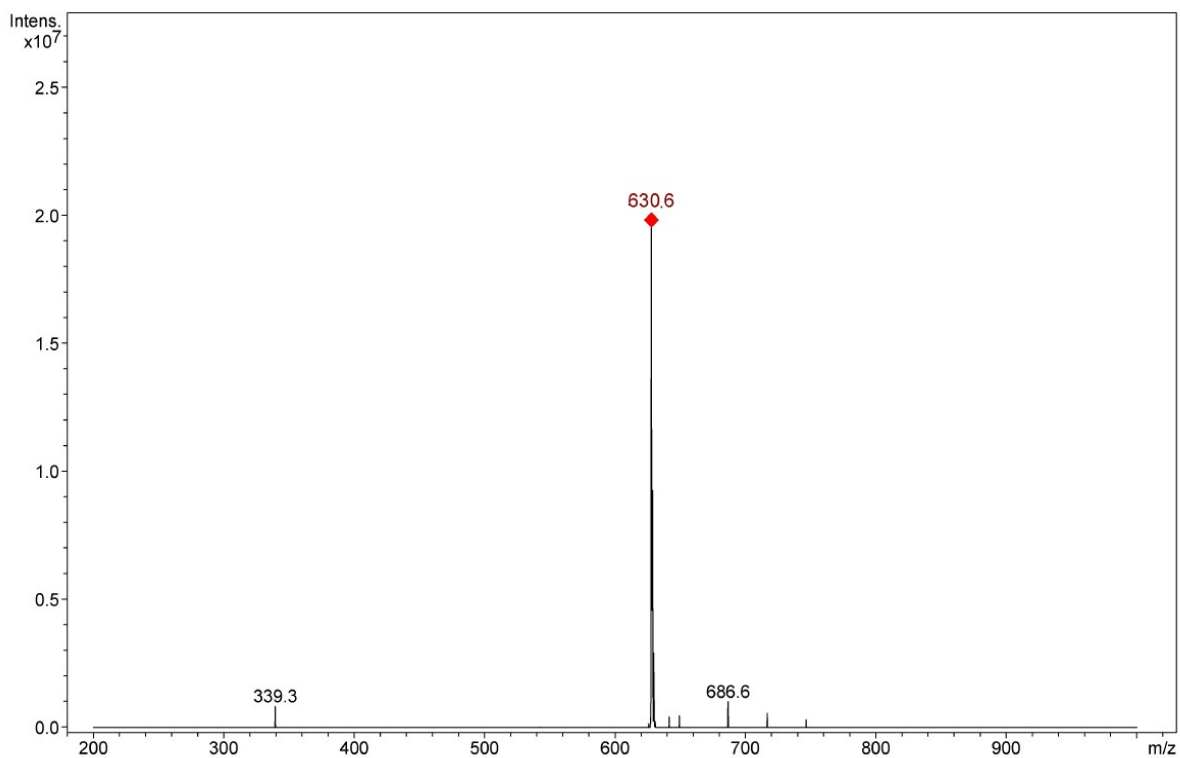

Figure S1 Electrospray ionization (ESI) mass spectroscopy of compound **1** in water.



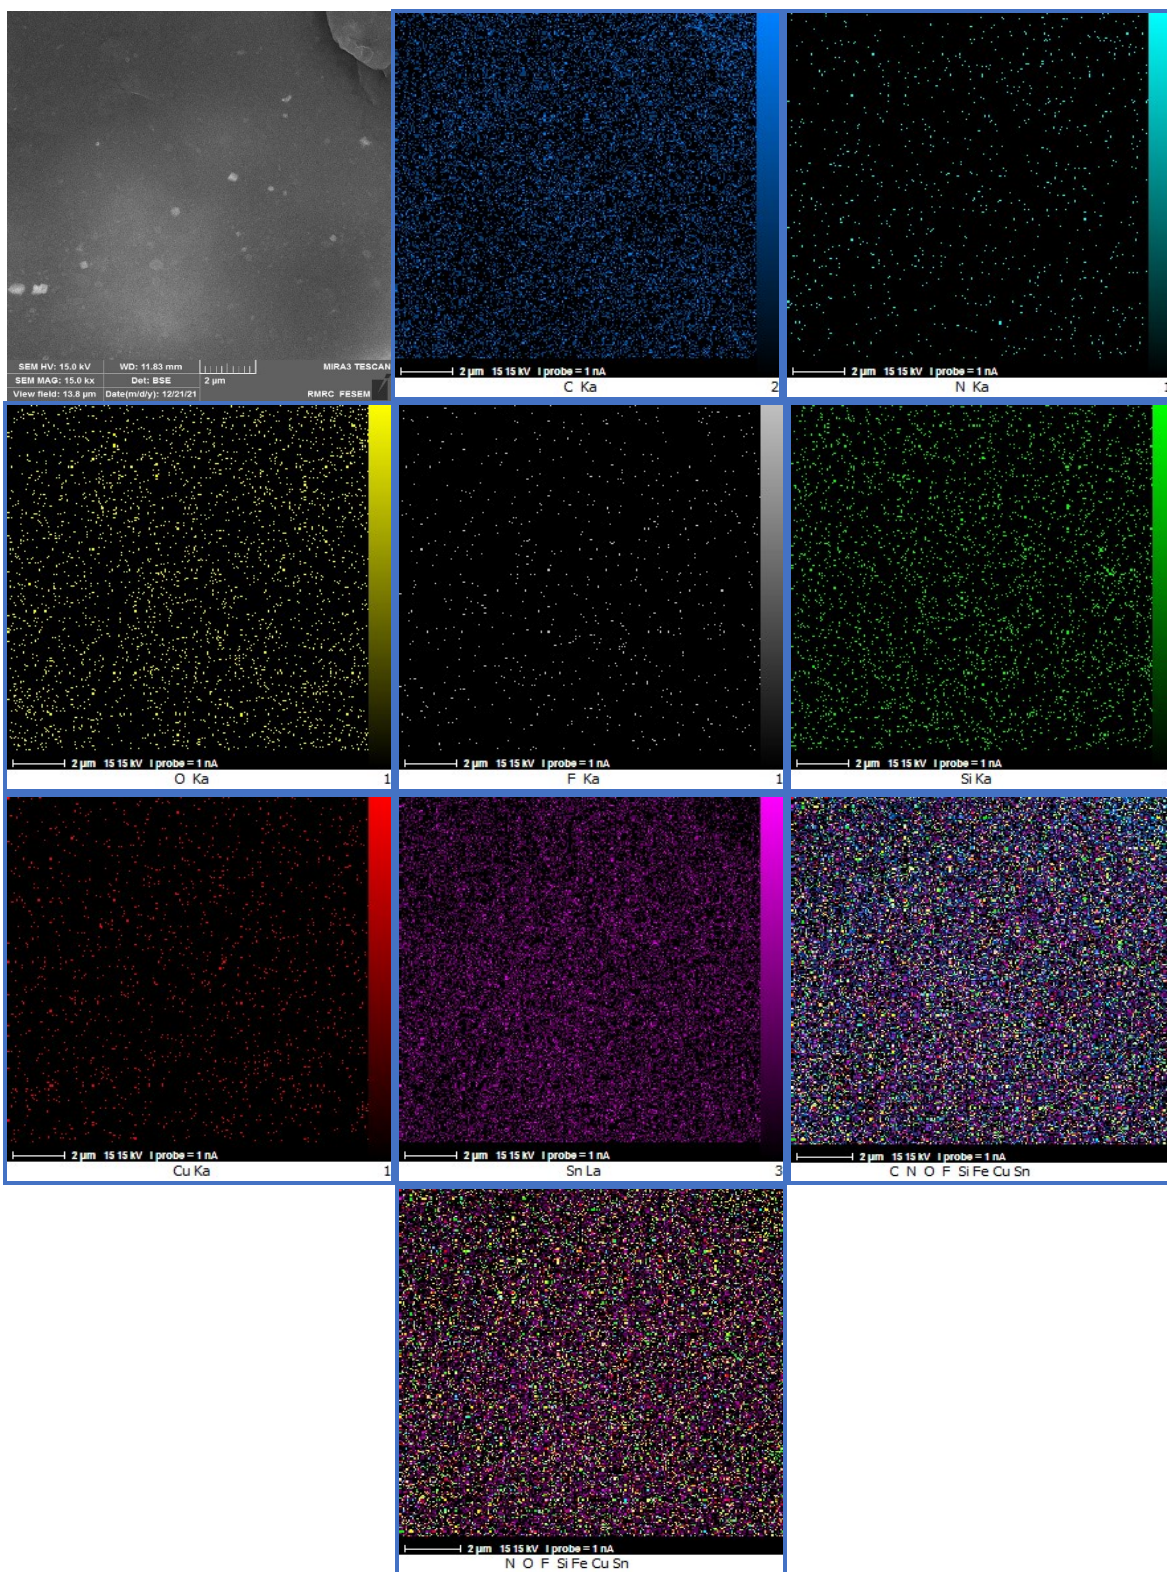

Figure S2 SEM and corresponding EDX mapping of the working electrode (FTO) in the presence of compound **1** at 0.11 V for 3 hours.

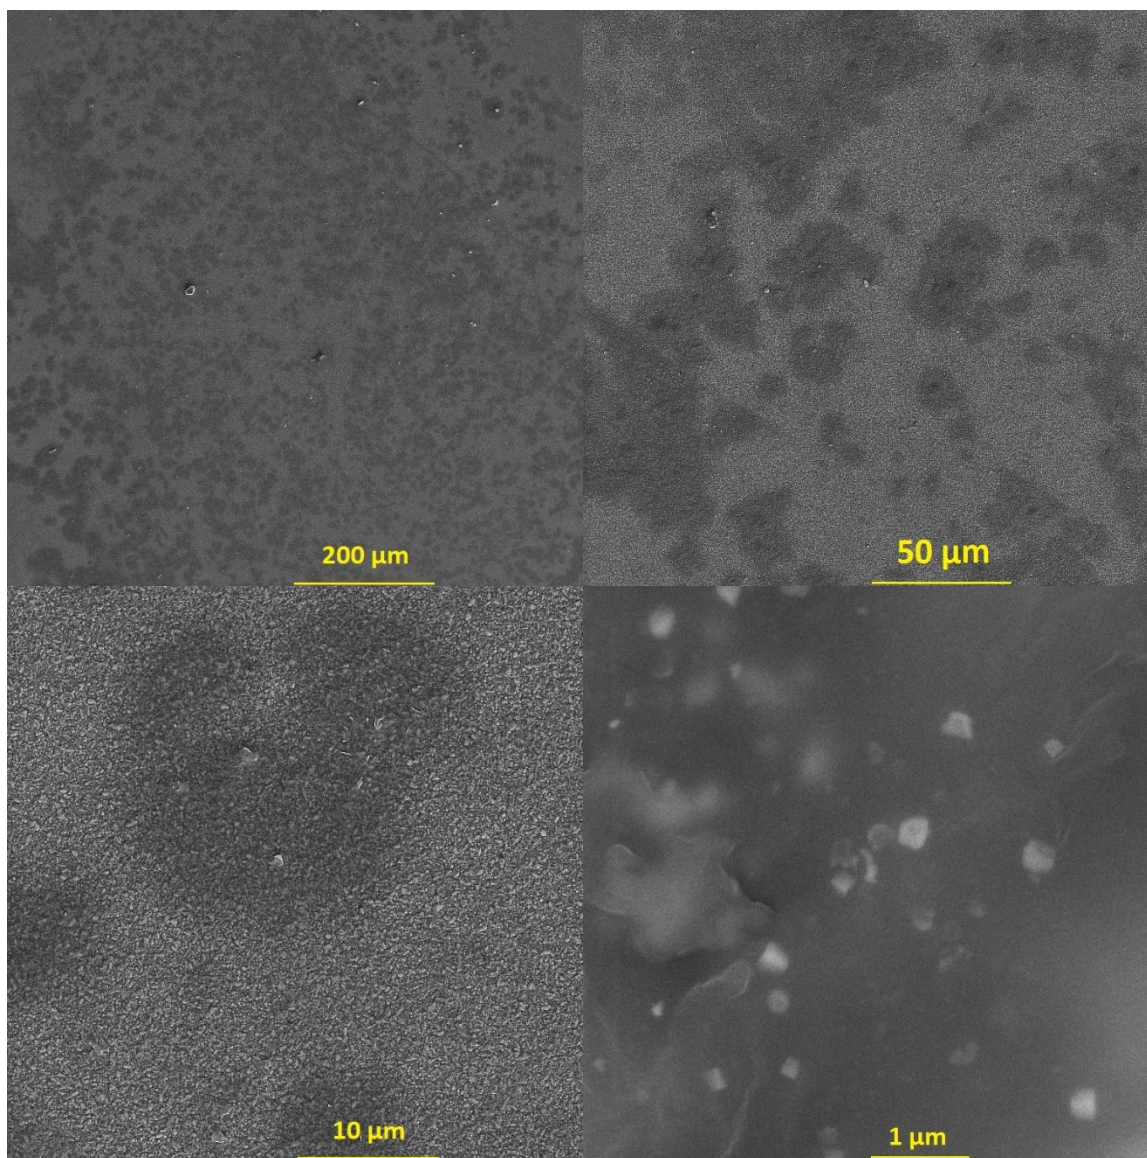

Figure S3 SEM images of the working electrode (FTO) in the presence of compound **1** at 2.41 V for 3 hours.

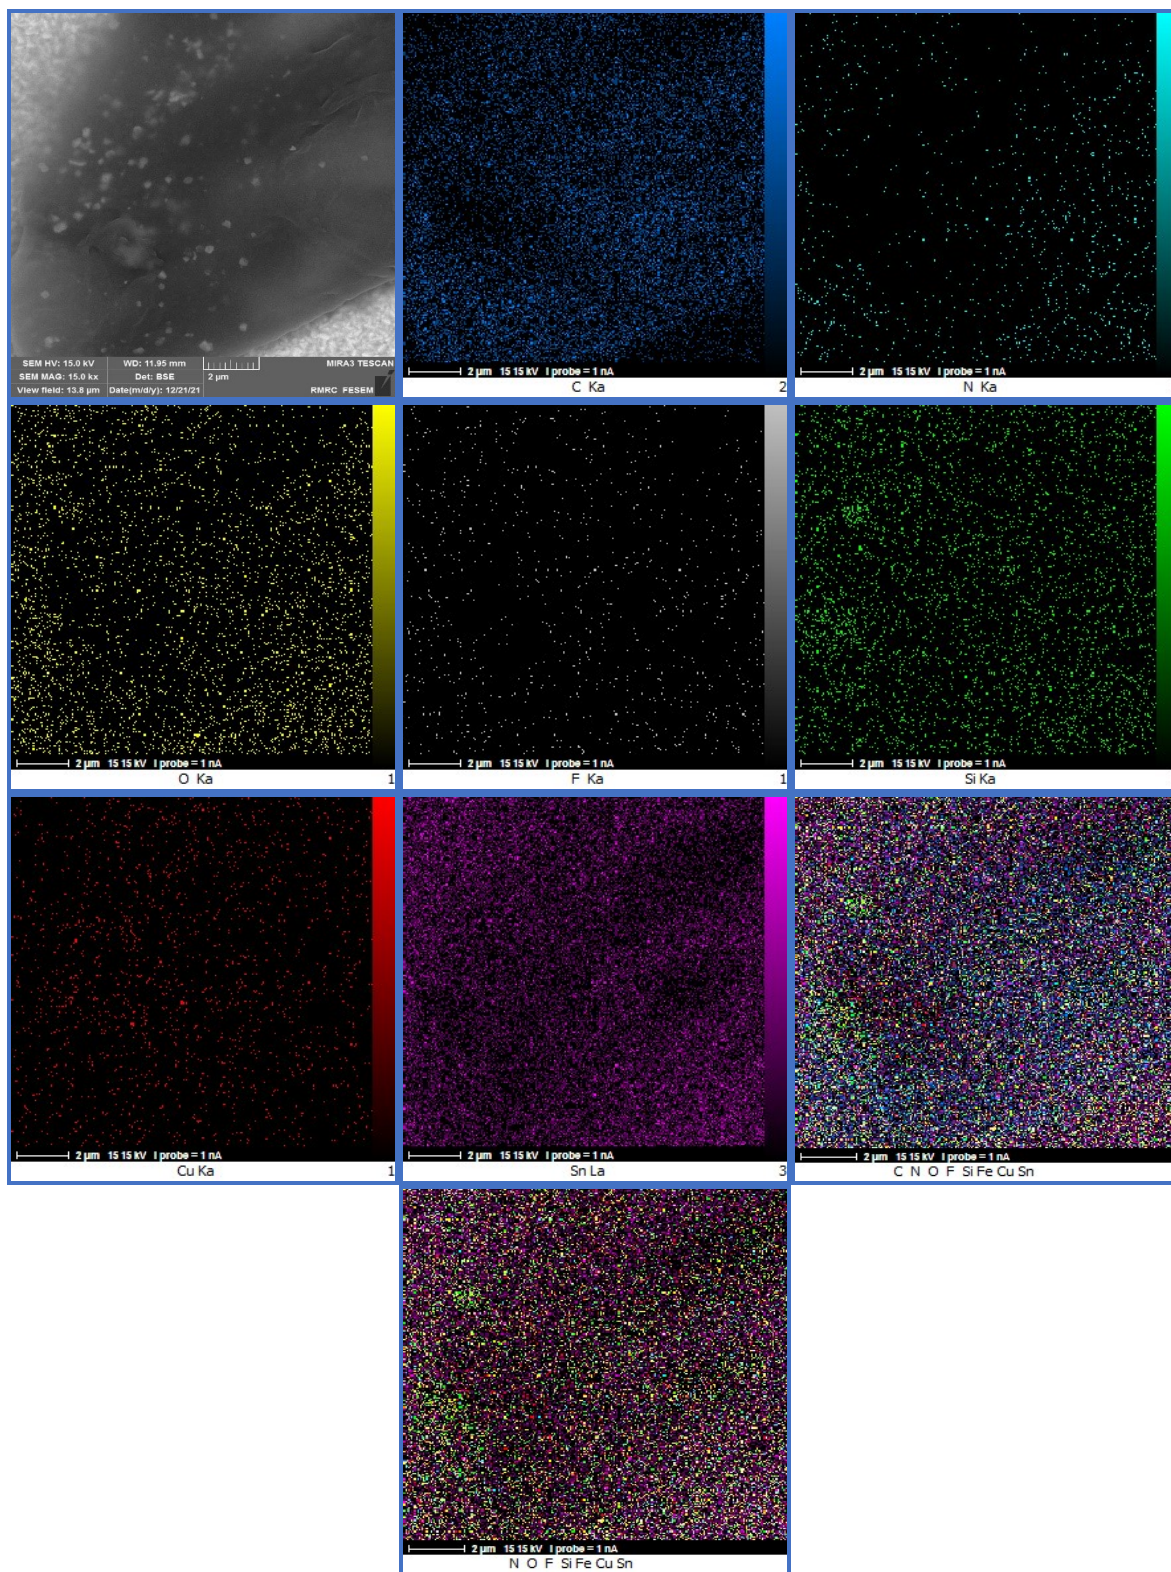

Figure S4 SEM and corresponding EDX mapping of the working electrode (FTO) in the presence of compound **1** at 2.41 V for 3 hours.

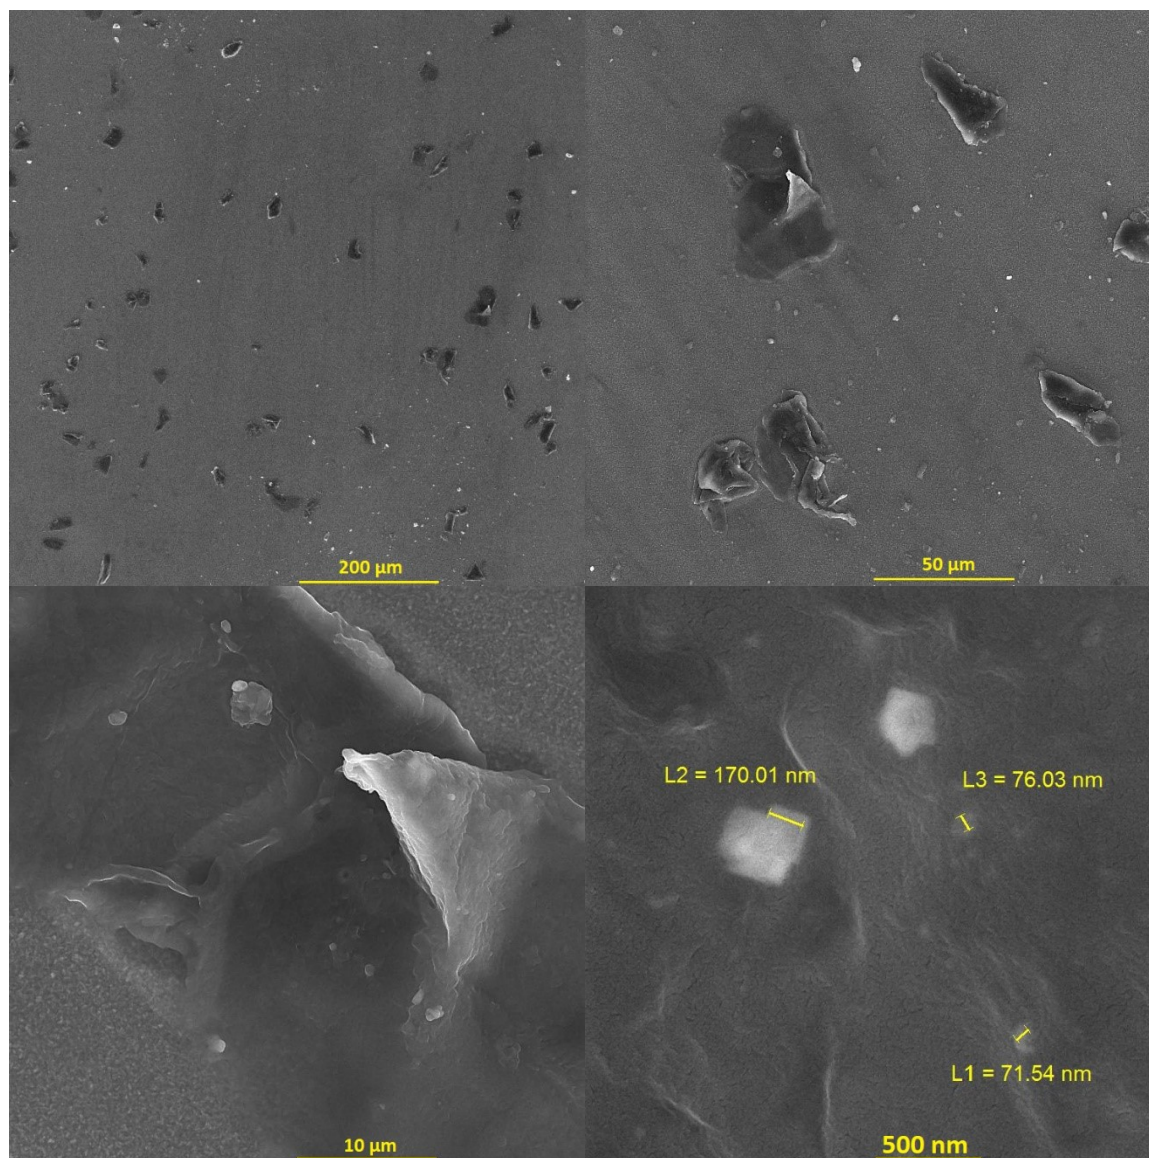

Figure S5 SEM images of the working electrode (FTO) in the presence of compound **1** at 2.31 V for 3 hours.

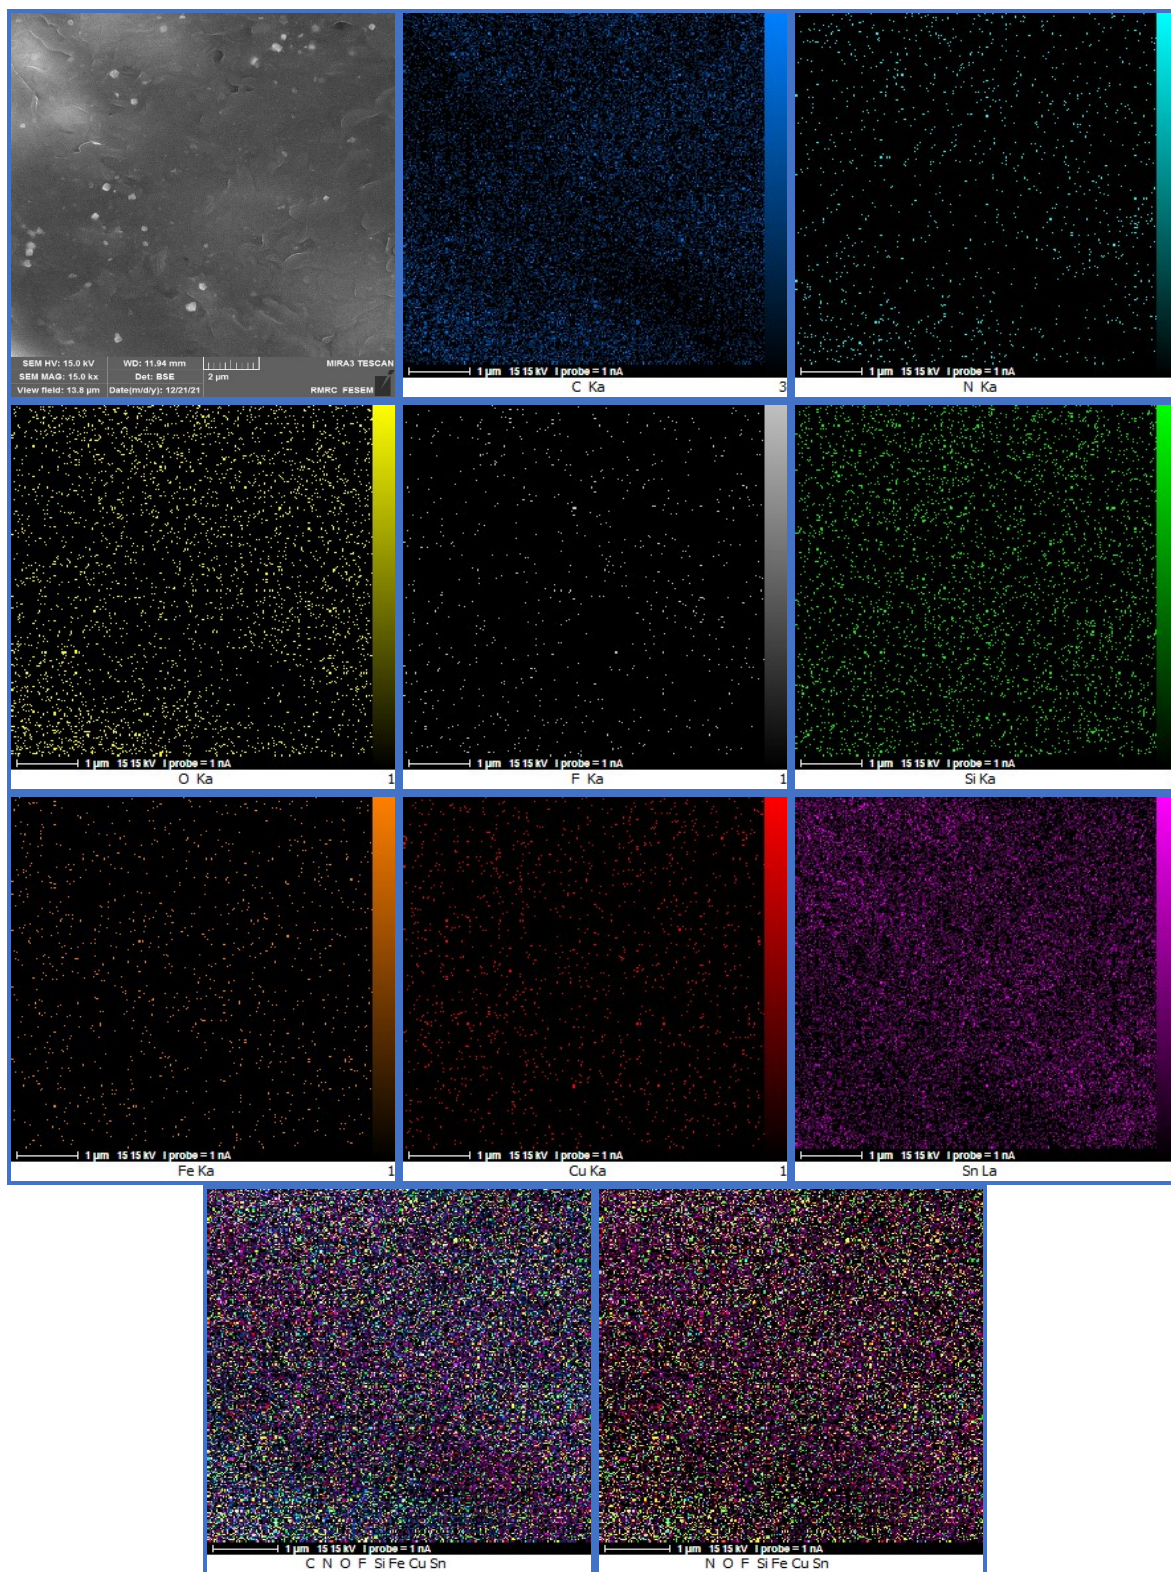

Figure S6 SEM and corresponding EDX mapping of the working electrode (FTO) in the presence of compound **1** at 2.41 V for 3 hours.
